# Supplementary material for: Prussian blue nanozyme-mediated nanoscavenger ameliorates acute pancreatitis via inhibiting TLRs/NF-κB signaling pathway
Source: PubMed Central journal article supplement (PMC7847676; doi:10.7150/thno.52010), 2021-01-01
Supplement: thnov11p3213s1.pdf [file thnov11p3213s1.pdf]

---

## Supporting Information

### **Prussian Blue Nanozyme-mediated nanoscavenger treats acute pancreatitis via inhibiting TLRs/NF- $\kappa$ B signaling pathway**

Xue Xie<sup>1,4</sup>, Jiulong Zhao<sup>2</sup>, Wei Gao<sup>1</sup>, Jie Chen<sup>3</sup>✉, Bing Hu<sup>3</sup>, Xiaojun Cai<sup>1</sup>✉, Yuanyi Zheng<sup>1,3</sup>✉

1. Department of Ultrasound in Medicine, Shanghai Jiao Tong University Affiliated Sixth People's Hospital, Shanghai, 200233, P. R. China
2. Department of Gastroenterology, Changhai Hospital, Second Military Medical University, Shanghai 200433, P. R. China.
3. Shanghai Institute of Ultrasound in Medicine, Shanghai Jiao Tong University Affiliated Sixth People's Hospital, Shanghai, 200233, P. R. China.
4. Chongqing Key Laboratory of Ultrasound Molecular Imaging, Ultrasound Department of the Second Affiliated Hospital of Chongqing Medical University. Chongqing 400010, P. R. China.

✉ Corresponding author: Yuanyi Zheng, PhD, Prof. E-mail: [zhengyuanyi@sjtu.edu.cn](mailto:zhengyuanyi@sjtu.edu.cn); Jie Chen, PhD, E-mail: [808393@163.com](mailto:808393@163.com); Xiaojun Cai, PhD, E-mail: [c1x2j34@163.com](mailto:c1x2j34@163.com).

\* Xue Xie, Jiulong Zhao and Wei Gao contributed equally to this work.

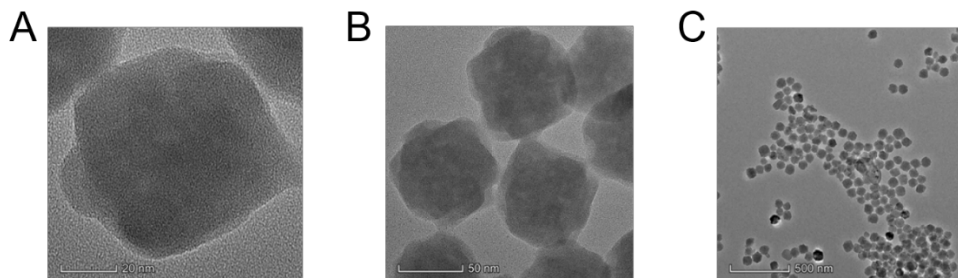

**Figure S1.** Transmission electron microscope image of PBzyme in various magnification.

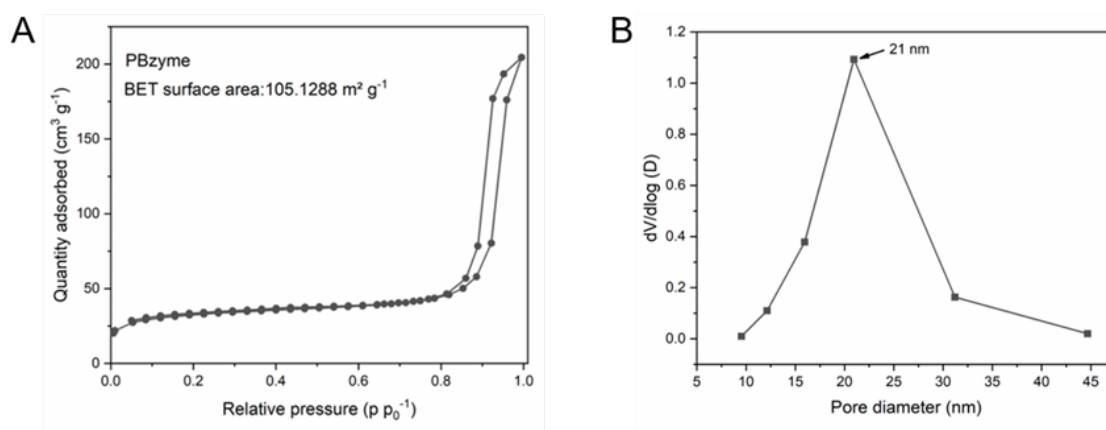

**Figure S2.** (A) N<sub>2</sub> adsorption-desorption isotherms of PBzyme. (B) The pore size distribution of PBzyme.

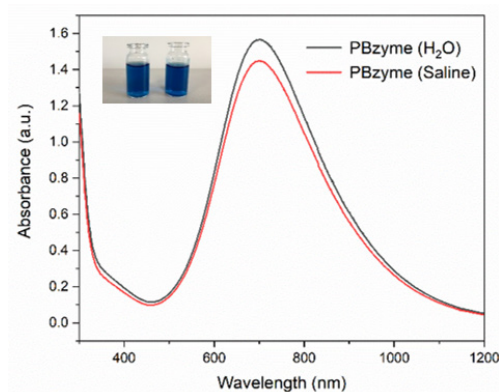

**Figure S3.** The UV-vis-NIR absorbance of PBzyme dispersed in water and normal saline. (Illustration: digital photographs of PBzyme in water and normal saline).

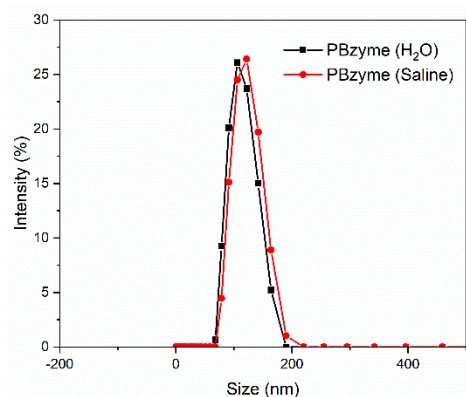

**Figure S4.** The hydrodynamic diameters of PBzyme in water and normal saline.

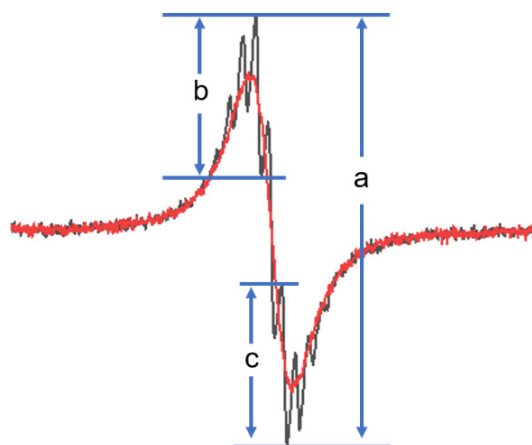

**Figure S5.** O<sub>2</sub> generation from PBzyme-catalyzed H<sub>2</sub>O<sub>2</sub> degradation by ESR oximetry. The nitrogen nucleus shows ESR triplet spectrum in CTPO. The ESR spectrum of CTPO shows proton hyperfine structure in nitrogen saturated solution (black line), with the increase of oxygen concentration, the collision frequency between oxygen and nitroxide radical increases, the ESR triplet spectrum broadens, and the resolution of proton hyperfine structure decreases (red line). The change of oxygen concentration in the solution can be detected by calculating K value ( $k = (b+c)/2a$ ) [1]. The smaller the k value is, the higher the oxygen concentration is.

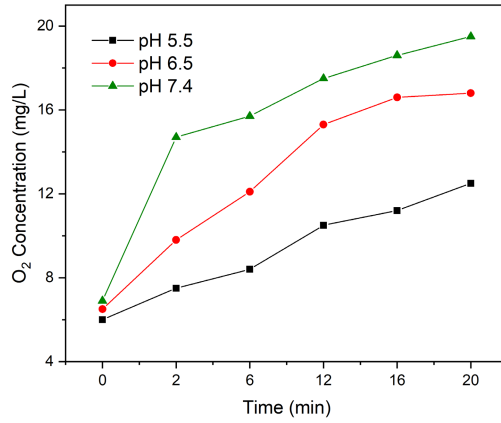

**Figure S6.** Oxygen generation catalyzed by PBzyme increased gradually with time at pH5.5, pH6.5 and pH7.4.

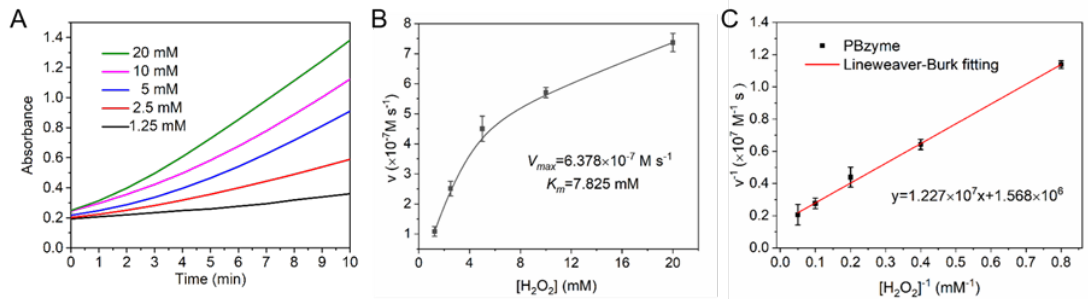

**Figure S7.** In vitro characterizations of the catalytic performance of PBzyme with  $\text{H}_2\text{O}_2$ . (A) The absorbance changes of PBzyme with different concentration of  $\text{H}_2\text{O}_2$  at different time points. (B) Michaelis-Menten fitting curve of PBzyme with  $\text{H}_2\text{O}_2$  as substrate. (C) Lineweaver-Burk plotting for PBzyme with  $\text{H}_2\text{O}_2$  as substrate.

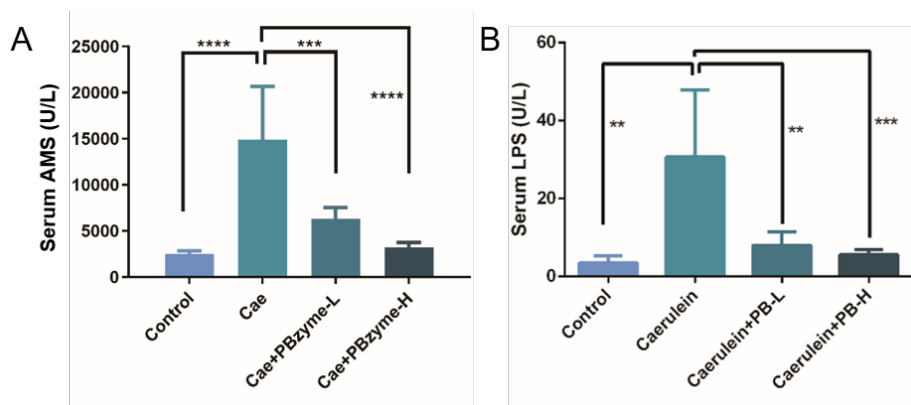

**Figure S8.** The levels of (A) serum AMS; and (B) serum LPS changed in various groups. (\*,  $p < 0.05$ ; \*\*,  $p < 0.01$ ; \*\*\*,  $p < 0.001$ , \*\*\*\*,  $p < 0.0001$ ).

Schmidt pancreatic histopathological scoring standard

| Pathological changes      | Score |              |              |                         |
|---------------------------|-------|--------------|--------------|-------------------------|
|                           | 0     | 1            | 2            | 3                       |
| Interstitial edema        | None  | Interlobular | Intralobular | Acinus manifest islands |
| Inflammatory infiltration | None  | <20          | 20-50        | >50                     |
| Parenchymal necrosis      | None  | <5%          | 5-20%        | >20%                    |
| Parenchymal hemorrhage    | None  | 1-2          | 3-5          | >5                      |

**Figure S9.** Schmidt pancreatic histopathological score standard to evaluate the pancreatic histopathological score index of each group.

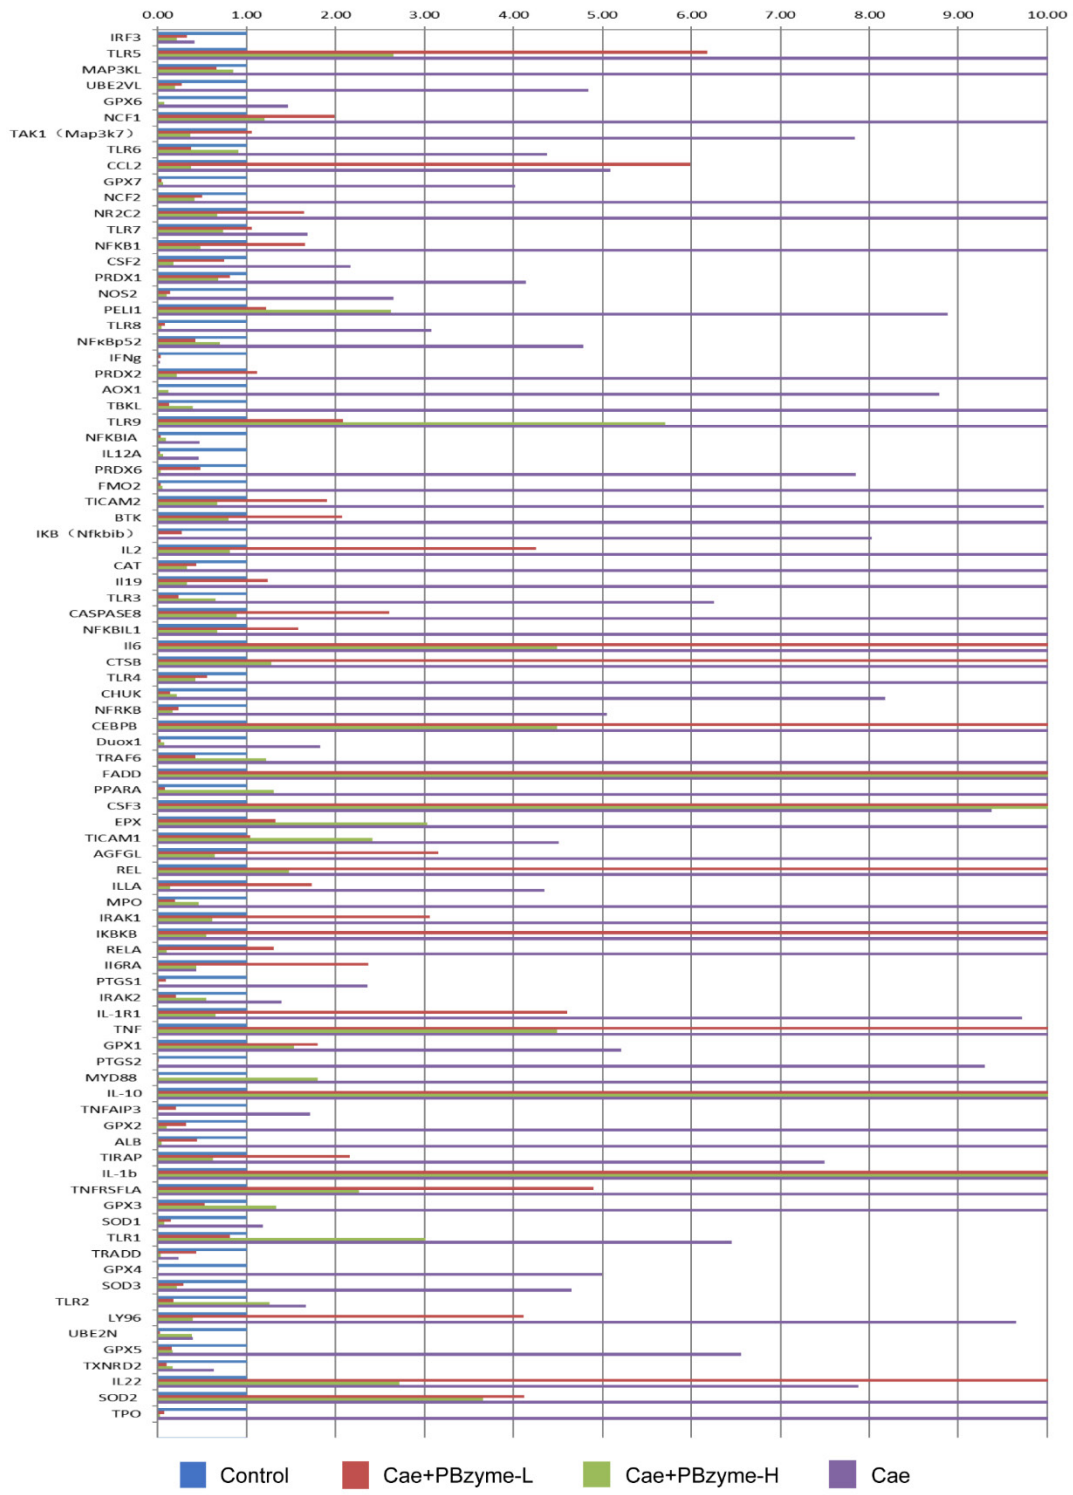

**Figure S10.** Cytokine profiles from a multiplexed cytokine assay of mice in the various groups (Control, Caerulein, Caerulein+PBzyme-L and Caerulein+PBzyme-H).

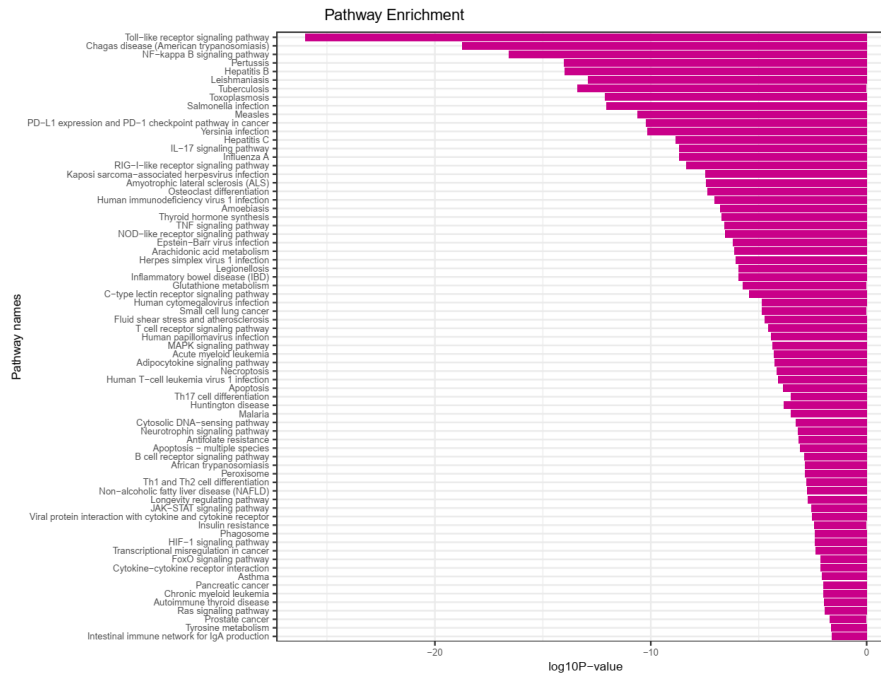

**Figure S11.** KEGG pathway analysis of the effect of PBzyme on caerulein-induced acute pancreatitis in mice. The name and reference sequence (Ref Seq) of target genes in inflammation-related and oxidation-related signaling pathways from the National Biotechnology Information Center (NCBI).

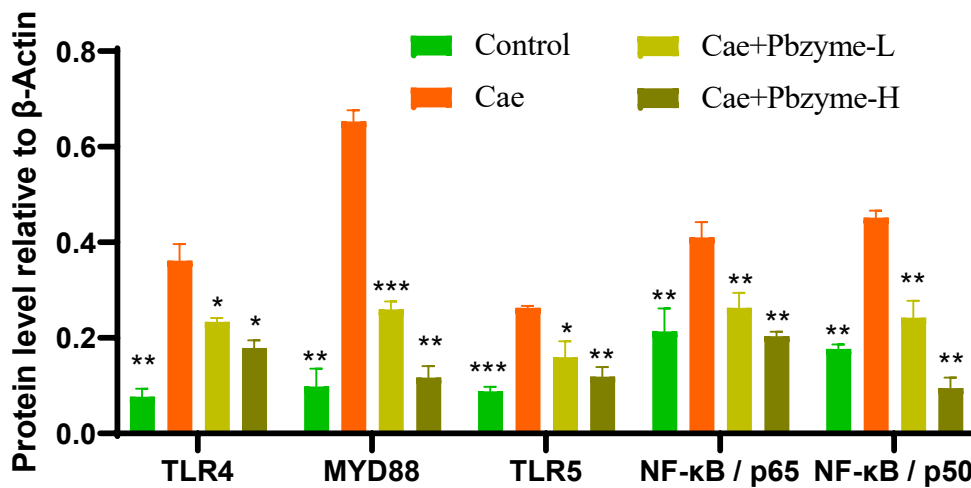

**Figure S12.** The quantification analysis of the protein levels of TLR4, MYD88, TLR5, NF- $\kappa$ B/p65 and NF- $\kappa$ B/p50 related to Toll-like receptor (TLR) and NF- $\kappa$ B signaling pathway in various groups. (n = 3) (\*, p < 0.05; \*\*, p < 0.01; \*\*\*, p < 0.001).

| Number | Gene Name     | RefSeq         | Number | Gene Name      | RefSeq         |
|--------|---------------|----------------|--------|----------------|----------------|
| 1      | IRF3          | NM_016849.4    | 45     | DUOX1          | NM_001099297.1 |
| 2      | TLR5          | NM_016928.2    | 46     | TRAF6          | NM_009424.3    |
| 3      | MAP3KL        | NM_011945.2    | 47     | FADD           | NM_010175.5    |
| 4      | UBE2VL        | NM_001311131.1 | 48     | PPARA          | NM_001113418.1 |
| 5      | GPX6          | NM_145451.3    | 49     | CSF3           | NM_009971.1    |
| 6      | NCF1          | NM_001286037.1 | 50     | EPX            | NM_007946.2    |
| 7      | TAK1 (Map3k7) | NM_009316.1    | 51     | TICAM1         | NM_174989.4    |
| 8      | TLR6          | NM_011604.3    | 52     | AGFGL          | NM_001310713.1 |
| 9      | CCL2          | NM_011333.3    | 53     | REL            | NM_009044.2    |
| 10     | GPX7          | NM_024198.3    | 54     | ILLA           | NM_010554.4    |
| 11     | NCF2          | NM_010877.5    | 55     | MPO            | NM_010824.2    |
| 12     | NR2C2         | NM_001347342.1 | 56     | IRAK1          | NM_001177973.1 |
| 13     | TLR7          | NM_133211.3    | 57     | IKBKB          | NM_001159774.1 |
| 14     | NFkB1         | NM_008689.2    | 58     | RELA           | NM_009045.4    |
| 15     | CSF2          | NM_009969.4    | 59     | IL6RA          | NM_001310676.1 |
| 16     | PRDX1         | NM_011034.4    | 60     | PTGS1          | NM_008969.4    |
| 17     | NOS2          | NM_010927.3    | 61     | IRAK2          | NM_001113553.1 |
| 18     | PELI1         | NM_023324.2    | 62     | IL1R1          | NM_001123382.1 |
| 19     | TLR8          | NM_133212.2    | 63     | TNF            | NM_013693.2    |
| 20     | NFkBp52       | NM_001177369.1 | 64     | GPX1           | NM_008160.6    |
| 21     | IFNG          | NM_008337.3    | 65     | PTGS2          | NM_011198.3    |
| 22     | PRDX2         | NM_011563.5    | 66     | MYD88          | NM_010851.2    |
| 23     | AOX1          | NM_009676.2    | 67     | IL10           | NM_010548.2    |
| 24     | TBKL          | NM_019786.4    | 68     | TNFAIP3        | NM_001166402.1 |
| 25     | TLR9          | NM_031178.2    | 69     | GPX2           | NM_030677.2    |
| 26     | NFkBIA        | NM_001105720.2 | 70     | ALB            | NM_009654.4    |
| 27     | IL12A         | NM_001159424.1 | 71     | TIRAP          | NM_001177845.1 |
| 28     | PRDX6         | NM_007453.3    | 72     | IL1B           | NM_008361.3    |
| 29     | FMO2          | NM_018881.3    | 73     | TNFRSFLA       | NM_011609.4    |
| 30     | TICAM2        | NM_173394.3    | 74     | GPX3           | NM_008161.3    |
| 31     | BTK           | NM_013482.2    | 75     | SOD1           | NM_011434.1    |
| 32     | IKB (Nfkbib)  | NM_001306222.1 | 76     | TLR1           | NM_030682.1    |
| 33     | IL2           | NM_008366.3    | 77     | TRADD          | NM_001033161.2 |
| 34     | CAT           | NM_012520.1    | 78     | GPX4           | NM_001037741.3 |
| 35     | II19          | NM_001009940.1 | 79     | SOD3           | NM_011435.3    |
| 36     | TLR3          | NM_126166.4    | 80     | TLR2           | NM_011905.3    |
| 37     | CASPASE 8     | NM_009812      | 81     | LY96           | NM_001159711.1 |
| 38     | NFkBIL1       | NM_010909.4    | 82     | UBE2N          | NM_080560.3    |
| 39     | II6           | NM_031168.1    | 83     | GPX5           | NM_010343.2    |
| 40     | CTSB          | NM_007798.3    | 84     | TXNRD2         | NM_013711.3    |
| 41     | TLR4          | NM_021297.2    | 85     | IL22           | NM_016971.2    |
| 42     | CHUK          | NM_001162410.1 | 86     | SOD2           | NM_013671.3    |
| 43     | NFRkB         | NM_172766.3    | 87     | TPO            | NM_009417.2    |
| 44     | CEBPB         | NM_024125.4    | 88     | $\beta$ -actin | NM_007393.5    |



---

**Table S1.** The Gene Names and Reference Sequence (Ref Seq) mostly related to inflammation and oxidation signaling pathways from National Center for Biotechnology Information (NCBI).

## **REFERENCES**

- [1] Zeng F, Wu Y, Li X, et al. Custom-Made Ceria Nanoparticles Show a Neuroprotective Effect by Modulating Phenotypic Polarization of the Microglia. *Angew Chem Int Ed Engl.* 2018;57:5808-12.
